# Supplementary material for: Analysis of Wastewater Reveals the Spread of Diverse Extended-Spectrum β-Lactamase-Producing E. coli Strains in uMgungundlovu District, South Africa
Source: MDPI journal article supplement (doi:10.3390/antibiotics10070860), 2021-07-15
Supplement: s1 [file s1]

*Supplementary Materials*

# **Analysis of Wastewater Reveals the Spread of Diverse Extended-spectrum $\beta$ -Lactamase-producing *E. coli* Strains in uMgungundlovu District, South Africa**

**Siyabonga N. Gumede<sup>1</sup>, Akebe L. K. Abia<sup>1,\*</sup>, Daniel G. Amoako<sup>1,2\*</sup>, Sabiha Y. Essack<sup>1</sup>**

<sup>1</sup> Antimicrobial Research Unit, College of Health Sciences, University of KwaZulu-Natal, Durban 4000, South Africa; (S.N.G.); [lutherkinga@yahoo.fr](mailto:lutherkinga@yahoo.fr) (A.L.K.A.); [amoakodg@gmail.com](mailto:amoakodg@gmail.com) (D.G.A.); [essacks@ukzn.ac.za](mailto:essacks@ukzn.ac.za) (S.Y.E.)

<sup>2</sup> Centre for Respiratory Diseases and Meningitis, National Institute for Communicable Diseases, Johannesburg 2131, South Africa

\* Correspondence: [lutherkinga@yahoo.fr](mailto:lutherkinga@yahoo.fr) (A.L.K.A.); [amoakodg@gmail.com](mailto:amoakodg@gmail.com) (D.G.A.)

**Table S1. Multidrug-resistant E. coli phenotypes identified in the study.**

| MDR PHENOTYPES OBSERVED IN ISOLATES                                                     | WATEWATER TREATMENT PLANTS |     |        |     |        |     |        |     |
|-----------------------------------------------------------------------------------------|----------------------------|-----|--------|-----|--------|-----|--------|-----|
|                                                                                         | WWTP A                     |     | WWTP B |     | WWTP C |     | WWTP D |     |
|                                                                                         | Inf                        | Eff | Inf    | Eff | Inf    | Eff | Inf    | Eff |
| FOX-LEX-CHL-NAL-SXT                                                                     | 1                          |     |        |     |        |     |        |     |
| PIP-TET-AMX-NAL-AMP-SXT                                                                 |                            | 1   |        |     |        |     |        |     |
| CHL-TET-CEF-CXM-AMX-AMP-SXT                                                             |                            | 1   |        |     |        |     |        |     |
| PIP-TET-CEF-CXM-AMX-AMP-SXT-CTX                                                         |                            |     |        |     |        | 1   |        |     |
| TET-CFM-CXM-AMX-CIP-NAL-AMP-SXT-CTX                                                     |                            |     |        |     |        | 1   |        |     |
| LEX-TET-AMX-AMP-SXT                                                                     |                            |     | 1      |     |        |     |        |     |
| TET-CEF-CXM-AMX-AMP-SXT                                                                 |                            |     |        |     |        | 1   |        |     |
| LEX-CHL-TET-CXM-AMX-CIP-NAL-AMP                                                         |                            |     |        |     |        | 1   |        |     |
| FOX-LEX-CAZ-FEP-CEF-CFM-CXM-AMX-NAL-AMP                                                 |                            |     | 1      |     |        |     |        |     |
| FOX-AMC-AMK-LEX-CHL-GEN-MEM-CAZ-FEP-TGC-PIP-TET-CEF-CFM-CXM-AMX-CIP-NAL-AMP-SXT-IMP-CTX |                            |     | 1      |     |        |     |        |     |
| LEX-TET-AMX-CIP-NAL-AMP                                                                 |                            |     |        |     |        |     | 1      |     |
| AMC-CHL-PIP-TET-CEF-AMX-AMP-SXT                                                         |                            |     |        |     |        | 1   |        |     |
| FOX-AMC-AMK-LEX-GEN-MEM-CAZ-FEP-TGC-NIT-PIP-TET-CEF-CFM-CXM-AMX-NAL-AMP-SXT-IMP-CTX     |                            |     |        |     |        | 1   |        |     |
| PIP-TET-CEF-CFM-CXM-AMX-CIP-NAL-AMP-SXT-CTX                                             |                            |     |        | 1   |        |     |        |     |
| TET-CEF-AMX-AMP-SXT                                                                     |                            |     |        |     |        |     | 1      |     |
| TET-CEF-CXM-AMX-AMP-SXT                                                                 |                            |     | 1      |     |        |     |        |     |
| CAZ-PIP-TET-CEF-CXM-AMX-CIP-NAL-AMP-SXT                                                 |                            |     |        | 1   |        |     |        |     |
| LEX-TET-CEF-CFM-CXM-AMX-CIP-NAL-AMP-SXT-CTX                                             |                            |     |        | 2   |        |     |        | 1   |
| LEX-GEN-PIP-TET-CEF-CFM-CXM-AMX-CIP-NAL-AMP-SXT-CTX                                     |                            |     |        |     |        | 1   |        |     |
| AMC-LEX-CHL-PIP-TET-CEF-CFM-CXM-AMX-CIP-NAL-AMP-SXT-CTX                                 |                            |     |        |     |        |     |        | 1   |
| LEX-CHL-TGC-PIP-TET-AMX-NAL-AMP-SXT                                                     |                            | 1   |        |     |        |     |        |     |
| FOX-AMC-AMK-LEX-GEN-MEM-CAZ-FEP-TGC-                                                    |                            |     |        | 1   |        |     |        | 1   |

|                                                                                             |          |          |          |           |          |           |          |          |
|---------------------------------------------------------------------------------------------|----------|----------|----------|-----------|----------|-----------|----------|----------|
| PIP-TET-CEF-CFM-CXM-AMX-AMP-SXT-IPM-CTX                                                     |          |          |          |           |          |           |          |          |
| LEX-TET-CEF-CFM-CXM-AMX-CIP-NAL-AMP-SXT-CTX                                                 |          |          |          |           |          | 1         |          |          |
| FOX-AMC-LEX-CHL-MEM-CAZ-FEP-TGC-PIP-TET-CEF-CFM-CXM-AMX-AMP-SXT-IMP-CTX                     | 1        |          |          |           |          |           |          |          |
| LEX-PIP-TET-CEF-CFM-CXM-AMX-CIP-NAL-AMP-SXT                                                 |          |          |          |           | 1        |           |          |          |
| FOX-AMC-AMK-LEX-CHL-GEN-MEM-CAZ-FEP-TGC-NIT-PIP-TET-CEF-CFM-CXM-AMX-CIP-NAL-AMP-SXT-IMP-CTX | 2        |          |          |           |          |           |          |          |
| FOX-AMC-LEX-CFM-AMX-NAL-AMP-SXT                                                             | 1        |          |          |           |          |           |          |          |
| FOX-AMC-AMK-LEX-GEN-MEM-CAZ-FEP-TGC-NIT-PIP-TET-CEF-CFM-CXM-AMX-CIP-NAL-AMP-SXT-IMP-CTX     |          | 1        |          | 1         | 1        |           |          | 1        |
| LEX-PIP-TET-CEF-CFM-CXM-AMX-CIP-NAL-AMP-SXT-CTX                                             |          | 2        | 1        | 4         |          | 2         | 5        | 5        |
| FOX-AMC-AMK-LEX-GEN-MEM-CAZ-FEP-TGC-PIP-TET-CEF-CFM-CXM-AMX-CIP-NAL-AMP-SXT-IMP-CTX         |          |          | 1        |           |          |           |          |          |
| LEX-CAZ-FEP-PIP-TET-CEF-CFM-CXM-AMX-CIP-NAL-AMP-SXT-CTX                                     |          | 1        |          |           |          |           |          |          |
| FOX-AMC-LEX-GEN-CAZ-FEP-PIP-TET-CEF-CFM-CXM-AMX-CIP-NAL-AMP-SXT-CTX                         |          | 1        |          |           |          |           | 1        |          |
| <b>TOTAL</b>                                                                                | <b>5</b> | <b>8</b> | <b>6</b> | <b>10</b> | <b>2</b> | <b>10</b> | <b>8</b> | <b>9</b> |

AMC = Amoxicillin/clavulanic acid, AMX = amoxicillin, AMP = ampicillin, PIP = piperacillin, CEF = cephalothin, LEX = cephalexin, FOX = cefoxitin, CXM = cefuroxime, CFM = cefixime, CTX = cefotaxime, CAZ = ceftazidime, FEP = cefepime, IMP = imipenem, MEM = meropenem, TET = tetracycline, TGC = tigecycline, AMK = amikacin, GEN = gentamicin, CIP = ciprofloxacin, NAL = nalidixic acid, CHL = chloramphenicol, NIT = nitrofurantoin, SXT = trimethoprim/sulfamethoxazole, Inf = Influent, Eff = Effluent.

**Table S2:** Primer sets used for the amplification of TEM, SHV, and CTX-M-type ESBLS.

| Target enzyme | Primer | Sequence 5' to 3'          | Amplicon size (bp) | Authors (Year) [Reference]        |
|---------------|--------|----------------------------|--------------------|-----------------------------------|
| TEM           | TEMMF  | TTACCAATGCTTAATCAGTGAG     | 840                | (Essack et al., 2001)             |
|               | TEMMR  | TTACCAATGCTTAATCAGTGAG     |                    |                                   |
| SHV           | SHVMF  | TTA ACT CCC TGT TAG CCA    | 860                | (Eckert, Gautier and Arlet, 2006) |
|               | SHVMR  | GAT TTG CTG ATT TCG CCC    |                    |                                   |
| CTX-1         | CTXMF  | GGT TAA AAA ATC ACT GCG TC | 1000               | (Eckert et al., 2004)             |
|               | CTXMR  | TTG GTG ACG ATT TTA GCC GC |                    |                                   |
